# Supplementary material
Source: MDPI journal article supplement (https://www.mdpi.com/2624-862X/3/4/49)
Supplement: s1 [file s1]

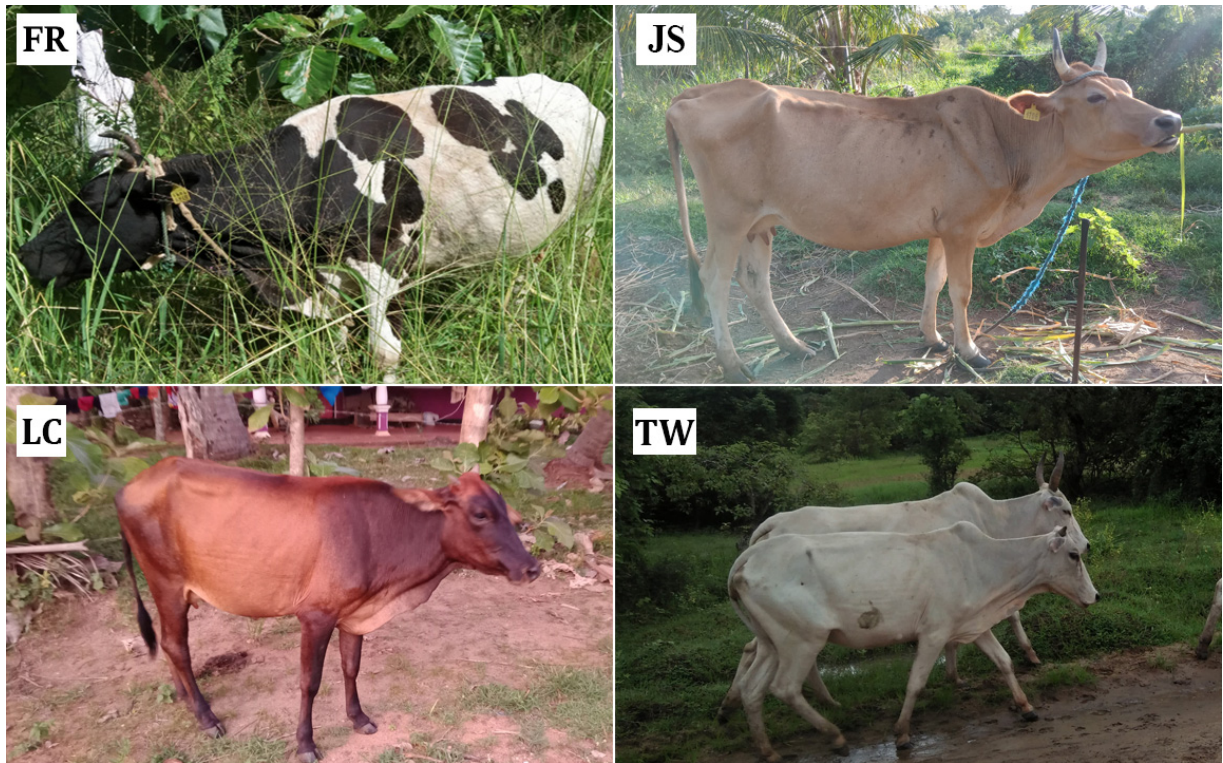

Supplementary Figure S1. Phenotypic view of the cattle breeds/types used in the current study; FR Friesian, JS-Jersey, LC-Lankan cattle and TW-Thamankaduwa White
